# Supplementary material
Source: HighWire-hosted journal article supplement (https://heart.bmj.com/content/106/17/1332)
Supplement: inline-supplementary-material-2 [file inline-supplementary-material-2.xlsx]

## Sheet: Trans-RV (PA vs SVC)
Metab	n_PAH	n_C	outCT_PAH	outCt_C	outGrubbs_PAH	outGrubbs_C	FC_of_means_PAH	FC_of_means_C	p_val	p_adj(FDR)
1-palmitoyl-GPE (16:0)	8	8	1	0	0	0	2.3103	0.7031	0.000636916	0.0133752
pyroglutamine*	7	8	1	0	1	0	1.1688	0.8907	0.000793244	0.0155549
histidine	7	4	1	0	1	4	0.9427	1.0989	0.000852512	0.0156788
X - 17137	5	3	4	4	0	1	0.8298	1.2563	0.00115979	0.0200826
X - 17337	7	7	1	0	1	1	1.2932	0.7843	0.00175494	0.0287093
3-methyl-2-oxovalerate	7	6	1	0	1	2	0.9142	1.0495	0.00185711	0.0287901
octadecanedioate	8	6	1	1	0	1	1.09	0.7679	0.00298011	0.043901
stearoylcarnitine	8	6	1	1	0	1	1.2086	0.7435	0.00414413	0.0581553
1-oleoyl-GPE (18:1)	8	6	1	0	0	2	1.4797	0.7813	0.00572387	0.0766895
X - 11795	5	5	4	0	0	3	1.123	0.8726	0.00599261	0.0768144
eicosenoate (20:1)	6	5	1	0	2	3	1.1684	0.845	0.00859882	0.101439
methionine	7	7	1	0	1	1	0.8954	1.0252	0.0084613	0.101439

## Sheet: Trans-RV Ratios
Metab	n_PAH	n_C	outCT_PAH	outCt_C	outGrubbs_PAH	outGrubbs_C	FC_of_means_PAH	FC_of_means_C	p_val	p_adj(FDR)
1-palmitoyl-GPE (16:0) / 1-linoleoyl-GPE (18:2)*	8	8	1	0	0	0	2.1756	0.6078	0.000583887	0.00923952
1-palmitoyl-GPE (16:0) / margarate (17:0)	8	7	1	0	0	1	2.0232	0.5542	0.000507941	0.00923952
eicosenoate (20:1) / palmitate (16:0)	8	7	1	0	0	1	1.1669	0.9096	0.000727363	0.00952184
1-palmitoyl-GPE (16:0) / palmitate (16:0)	8	8	1	0	0	0	2.1649	0.6446	0.00101803	0.00992546
1-palmitoyl-GPE (16:0) / stearate (18:0)	8	8	1	0	0	0	2.1016	0.6377	0.00102012	0.00992546
1-palmitoyl-GPE (16:0) / 1-oleoyl-GPE (18:1)	8	8	1	0	0	0	1.5014	0.7705	0.00182535	0.0141317
1-oleoyl-GPE (18:1) / 1-palmitoyl-GPE (16:0)	8	8	1	0	0	0	0.4583	1.3719	0.00182535	0.0141317
methionine / urate	8	7	1	0	0	1	0.9302	1.0502	0.00202488	0.0142235

## Sheet: Transpulmonary (AAO vs PA)
Metab	n_PAH	n_C	outCT_PAH	outCt_C	outGrubbs_PAH	outGrubbs_C	FC_of_means_PAH	FC_of_means_C	p_val	p_adj(FDR)
azelate (nonanedioate)	4	4	5	2	0	2	0.4187	1.2162	2.48314e-05	0.000571123
2-palmitoyl-GPC (16:0)*	8	6	1	0	0	2	0.8311	1.2167	0.000863771	0.018405
N6-acetyllysine	6	6	2	2	1	0	1.5302	0.7052	0.002397	0.0475741
N-acetylcarnosine	4	5	3	2	2	1	0.7165	1.0518	0.00367786	0.0683139
X - 13671	8	7	1	0	0	1	0.6883	1.0441	0.00500482	0.0873581
uridine	7	7	1	0	1	1	0.8941	1.0099	0.00639869	0.105339
indolelactate	4	3	3	2	2	3	0.9485	2.1548	0.00906072	0.141139

## Sheet: SVC
Metab	n_PAH	n_C	FC_PAHvsC	SVC_p_val	p_adj(FDR)
heptanoate (7:0)	5	8	1.9076	0.001554	0.0854701
gamma-glutamyltyrosine	6	6	1.2203	0.0021645	0.0882914
glycocholenate sulfate*	7	8	1.9392	0.0021756	0.0882914
caproate (6:0)	7	6	1.5433	0.004662	0.149901
pyruvate	6	8	1.2373	0.004662	0.149901

## Sheet: PA
Metab	n_PAH	n_C	FC_PAHvsC	PA_p_val	p_adj(FDR)
1-stearoyl-GPI (18:0)	8	6	3.8493	0.001332	0.0719281
Isobar: glucose, fructose, mannose, galactose, allose, altrose, etc.	7	7	1.2872	0.002331	0.0944056
N6-acetyllysine	7	7	0.488	0.002331	0.0944056

## Sheet: PA Ratios
Metab	n_PAH	n_C	FC_PAHvsC	PA_p_val	p_adj(FDR)
1-stearoyl-GPI (18:0) / dihomo-linolenate (20:3n3 or n6)	8	8	3.4629	0.000621601	0.0012432
1-stearoyl-GPI (18:0) / dihomo-linoleate (20:2n6)	8	8	3.5057	0.0029526	0.00516706
1-stearoyl-GPI (18:0) / arachidonate (20:4n6)	8	8	2.9431	0.004662	0.00725201
1-stearoyl-GPI (18:0) / 1-arachidonoyl-GPI (20:4)*	8	8	2.301	0.00699301	0.00979021
1-stearoyl-GPI (18:0) / 10-heptadecenoate (17:1n7)	8	6	4.5165	0.00799201	0.0101716

## Sheet: Lipidyzer - TransRV LipidSp
Metab	n_PAH	n_C	outCT_PAH	outCt_C	outGrubbs_PAH	outGrubbs_C	FC_of_means_PAH	FC_of_means_C	p_val	p_adj(FDR)
TAG55:3-FA18:2	6	8	0	0	2	1	1.2279	0.7713	0.0011843	0.0284232
TAG52:6-FA16:1	6	6	0	1	2	2	1.8551	0.746	0.00138671	0.0318062
TAG50:5-FA14:0	5	9	0	0	3	0	1.6986	0.7385	0.00287426	0.0631276
TAG54:4-FA18:0	7	6	0	0	1	3	1.4851	0.7584	0.00393954	0.0830023
TAG51:3-FA16:1	5	8	0	0	3	1	1.2657	0.8944	0.00421596	0.0853517
TAG54:7-FA22:6	5	9	0	0	3	0	1.4449	0.7746	0.00547541	0.104956
TAG56:4-FA18:2	7	5	0	0	1	4	1.4419	0.6518	0.00558988	0.104956
CE(20:2)	8	9	0	0	0	0	1.1048	0.9702	0.0077039	0.139585

## Sheet: Lipidyzer - transpulm LipidSp
Metab	n_PAH	n_C	outCT_PAH	outCt_C	outGrubbs_PAH	outGrubbs_C	FC_of_means_PAH	FC_of_means_C	p_val	p_adj(FDR)
PC(18:0/20:5)	7	6	0	0	1	3	0.9604	1.1981	0.00128609	0.0308661

## Sheet: Lipidyzer - SVC LipidSp
Metab	n_PAH	n_C	FC_PAHvsC	SVC_p_val	p_adj(FDR)

## Sheet: Lipidyzer - PA LipidSp
Metab	n_PAH	n_C	FC_PAHvsC	PA_p_val	p_adj(FDR)
PC(18:1/18:1)	7	7	1.5761	0.000582751	0.0262238

[truncated: 6 more sheets: Lipidyzer - AAO LipidSp, Lipidyzer - transRV FA, Lipidyzer - transpulm FA, Lipidyzer - SVC FA, Lipidyzer - PA FA, Lipidyzer - AAO FA]
